# Supplementary material for: Respiratory and allergic outcomes among 5-year-old children exposed to pesticides
Source: PubMed Central journal article supplement — Thorax. 2022 Feb 24;78(1):41–9. doi: 10.1136/thoraxjnl-2021-218068 (PMC9533533; doi:10.1136/thoraxjnl-2021-218068), 2022-02-24
Supplement: NIHMS1822914-supplement-1.pdf [file NIHMS1822914-supplement-1.pdf]

**Prof. Dr. med. H. Drexler**  
**Institute and Outpatient Clinic for Occupational, Social and Environmental Medicine of**  
**the University of Erlangen-Nuremberg**  
**Schillerstr.25 D-91054 Erlangen**

Intercomparison programme 57, 2016 for toxicological analyses in biological materials

Inst. für Arbeits-, Sozial- und Umweltmedizin, Schillerstr. 25, 91054 Erlangen

Environmental Analysis Unit  
 Occupational and Environmental Medicine  
 Att: Thomas Lundh, Dr Med Sci, Skånes  
 University Hospital  
 22185 Lund  
 Sweden

**Labor: 336**

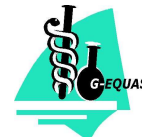

Erlangen, 2016/06/24

## Youden Plot

| No. | parameter      | evaluation   | your results   | ref. value     | tolerance range                | unit         |
|-----|----------------|--------------|----------------|----------------|--------------------------------|--------------|
| 83  | 3-PBA in urine | A: +<br>B: + | 2.100<br>5.840 | 2.072<br>6.063 | 1.655 - 2.489<br>4.833 - 7.293 | µg/l<br>µg/l |

3-PBA in urine (Environmental medical field)

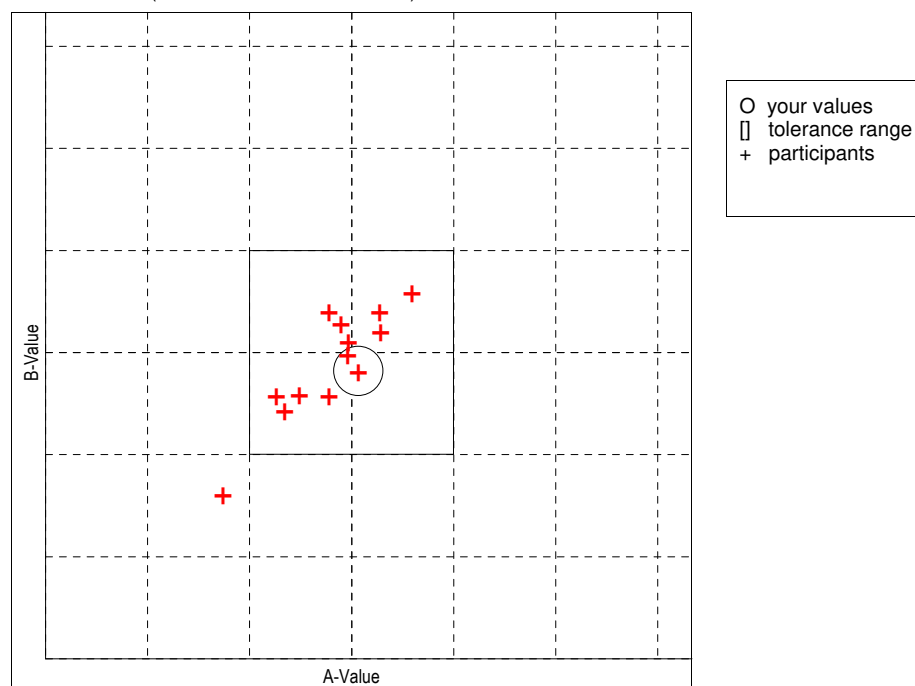

|                                           | <b>A</b> | <b>B</b>         |
|-------------------------------------------|----------|------------------|
| number of participants                    | 15       | 15               |
| within 3-fold tolerance range             | 13       | 14               |
| mean of 3-fold tolerance range            | 1.991    | 5.717            |
| standard deviation 3-fold tolerance range | 0.198    | 0.636            |
| both values within tolerance range        |          | 12 Labs; (80.0%) |

**Prof. Dr. med. H. Drexler**  
**Institute and Outpatient Clinic for Occupational, Social and Environmental Medicine of**  
**the University of Erlangen-Nuremberg**  
**Schillerstr.25 D-91054 Erlangen**

Intercomparison programme 57, 2016 for toxicological analyses in biological materials

Inst. für Arbeits-, Sozial- und Umweltmedizin, Schillerstr. 25, 91054 Erlangen

Environmental Analysis Unit  
Occupational and Environmental Medicine  
Att: Thomas Lundh, Dr Med Sci, Skånes  
University Hospital  
22185 Lund  
Sweden

**Labor: 336**

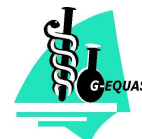

Erlangen, 2016/06/24

## Youden Plot

| No. | parameter                   | evaluation   | your results  | ref. value(**) | tolerance range             | unit         |
|-----|-----------------------------|--------------|---------------|----------------|-----------------------------|--------------|
| 166 | Trichloropyridinol in urine | A: +<br>B: + | 6.41<br>12.09 | 6.33<br>12.24  | 4.80 - 7.86<br>9.72 - 14.76 | µg/l<br>µg/l |

Trichloropyridinol in urine (Environmental medical field)

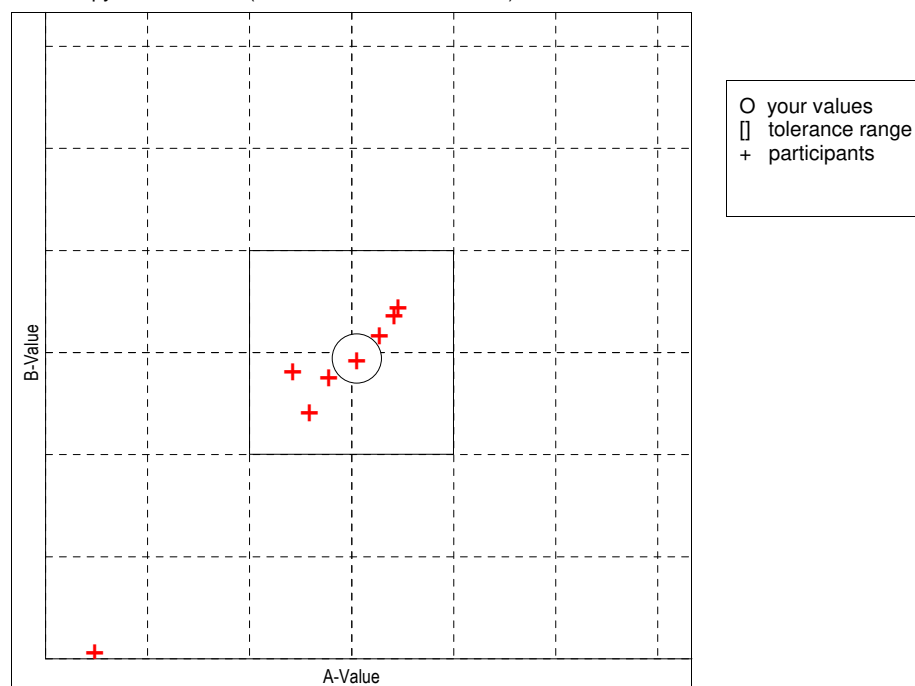

|                                           | <b>A</b> | <b>B</b>        |
|-------------------------------------------|----------|-----------------|
| number of participants                    | 9        | 9               |
| within 3-fold tolerance range             | 8        | 8               |
| mean of 3-fold tolerance range            | 5.85     | 11.32           |
| standard deviation 3-fold tolerance range | 1.38     | 2.56            |
| both values within tolerance range        |          | 7 Labs; (77.8%) |

(\*\*) consensus value: reference value based on dataset of participants

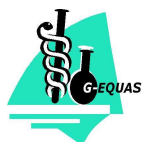

German External Quality Assessment Scheme

**Intercomparison programme 57, 2016  
for toxicological analyses in biological materials**

---

**Prof. Dr. med. H. Drexler**  
**on behalf of the German Society for Occupational and Environmental Medicine e.V**

Schillerstr 25, D-91054 Erlangen

External Quality Control acc. to the Guidelines of the German Federal Medical Council

Teilnehmer: Environmental Analysis Unit 336  
Occupational and Environmental Medicine  
Att: Thomas Lundh, Dr Med Sci, Skånes University Hospital  
22185 Lund  
Sweden

## Certificate

**valid until July 31, 2017**

This is to certify you participated in the intercomparison programme 57 / 2016 for occupational / environmental medical - toxicological analyses. In accordance with the guidelines issued by the German Federal Medical Council (Bundesärztekammer) of January 16th, 1987 and October 16th, 1987 and August 24th, 2001 on implementation of intercomparison programmes in the medical field you have fulfilled the requirements for the following parameters:

### Environmental medical field

Pb in blood  
3-PBA in urine  
MEHP in urine  
MBzP in urine  
Trichloropyridinol in urine  
Sn in urine

Pt in urine  
Cotinine in urine  
PFOA in serum  
Cu in urine  
Sb in urine

1-HP in urine  
5-OH-MEHP in urine  
PFOS in serum  
Sr in urine  
Mo in urine

Erlangen, 2016/06/24

Prof. Dr. med. H. Drexler

Prof. Dr. rer. nat. Th. Göen

**Prof. Dr. med. H. Drexler**  
**Institute and Outpatient Clinic for Occupational, Social and Environmental Medicine of**  
**the University of Erlangen-Nuremberg**  
**Schillerstr.25 D-91054 Erlangen**

Intercomparison programme 61, 2018 for toxicological analyses in biological materials

Inst. für Arbeits-, Sozial- und Umweltmedizin, Schillerstr. 25, 91054 Erlangen

Environmental Analysis Unit  
Occupational and Environmental Medicine  
Att: Thomas Lundh, Dr Med Sci  
22185 Lund  
Sweden

**Labor: 336**

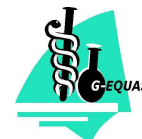

Erlangen, 2018/07/07

## Youden Plot

| No. | parameter      | evaluation   | your results   | ref. value     | tolerance range                | unit         |
|-----|----------------|--------------|----------------|----------------|--------------------------------|--------------|
| 83  | 3-PBA in urine | A: +<br>B: + | 0.660<br>3.240 | 0.614<br>2.915 | 0.488 - 0.740<br>2.459 - 3.371 | µg/l<br>µg/l |

3-PBA in urine (Environmental medical field)

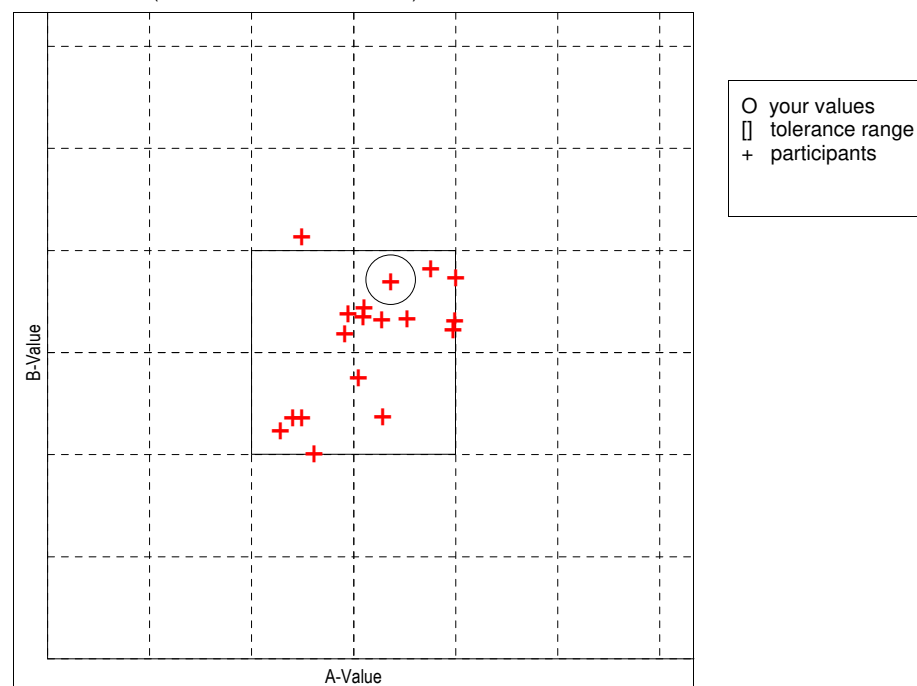

|                                           | <b>A</b> | <b>B</b>         |
|-------------------------------------------|----------|------------------|
| number of participants                    | 18       | 18               |
| within 3-fold tolerance range             | 18       | 18               |
| mean of 3-fold tolerance range            | 0.632    | 2.976            |
| standard deviation 3-fold tolerance range | 0.068    | 0.273            |
| both values within tolerance range        |          | 17 Labs; (94.4%) |

**Prof. Dr. med. H. Drexler**  
**Institute and Outpatient Clinic for Occupational, Social and Environmental Medicine of**  
**the University of Erlangen-Nuremberg**  
**Schillerstr.25 D-91054 Erlangen**

Intercomparison programme 61, 2018 for toxicological analyses in biological materials

Inst. für Arbeits-, Sozial- und Umweltmedizin, Schillerstr. 25, 91054 Erlangen

Environmental Analysis Unit  
 Occupational and Environmental Medicine  
 Att: Thomas Lundh, Dr Med Sci  
 22185 Lund  
 Sweden

**Labor: 336**



Erlangen, 2018/07/07

## Youden Plot

| No. | parameter                   | evaluation   | your results  | ref. value    | tolerance range              | unit         |
|-----|-----------------------------|--------------|---------------|---------------|------------------------------|--------------|
| 166 | Trichloropyridinol in urine | A: +<br>B: + | 2.69<br>50.90 | 2.28<br>48.38 | 1.59 - 2.97<br>39.38 - 57.38 | µg/l<br>µg/l |

Trichloropyridinol in urine (Environmental medical field)

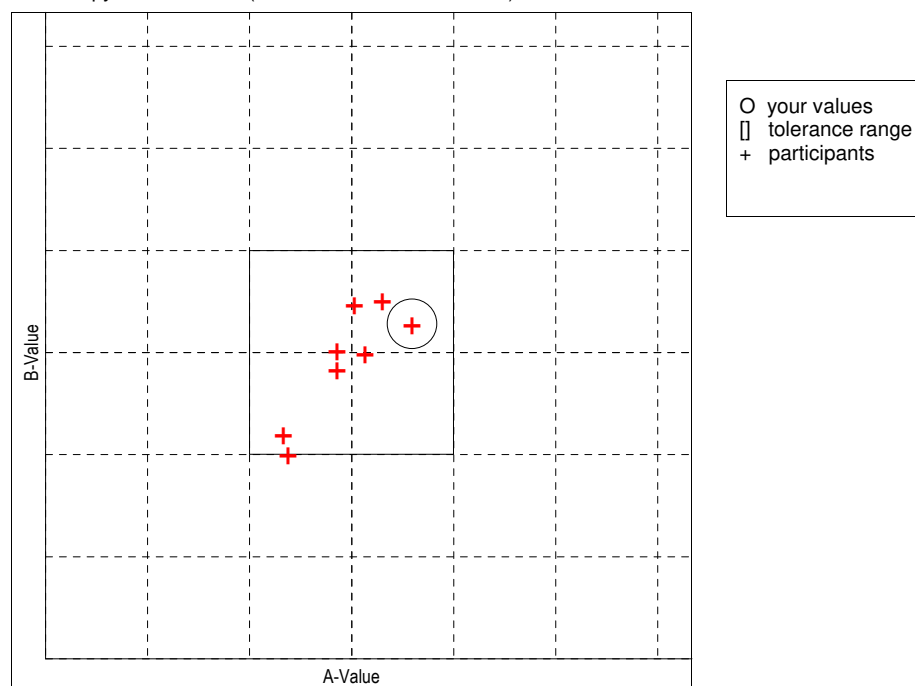

|                                           | A    | B                |
|-------------------------------------------|------|------------------|
| number of participants                    | 8    | 8                |
| within 3-fold tolerance range             | 8    | 8                |
| mean of 3-fold tolerance range            | 2.24 | 47.60            |
| standard deviation 3-fold tolerance range | 0.28 | 4.68             |
| both values within tolerance range        |      | 8 Labs; (100.0%) |

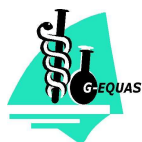

German External Quality Assessment Scheme

**Intercomparison programme 61, 2018  
for toxicological analyses in biological materials**

**Prof. Dr. med. H. Drexler**  
**on behalf of the German Society for Occupational and Environmental Medicine e.V**

Schillerstr 25, D-91054 Erlangen

External Quality Control acc. to the Guidelines of the German Federal Medical Council

Teilnehmer: Environmental Analysis Unit 336  
Occupational and Environmental Medicine  
Att: Thomas Lundh, Dr Med Sci  
22185 Lund  
Sweden

## Certificate

**valid until July 31, 2019**

This is to certify you participated in the intercomparison programme 61 / 2018 for occupational / environmental medical - toxicological analyses. In accordance with the guidelines issued by the German Federal Medical Council (Bundesärztekammer) of January 16th, 1987 and October 16th, 1987 and August 24th, 2001 on implementation of intercomparison programmes in the medical field you have fulfilled the requirements for the following parameters:

### Environmental medical field

Pb in blood  
3-PBA in urine  
5-oxo-MEHP in urine  
PFOA in serum  
Sr in urine  
Sb in urine  
TCS in urine

Pt in urine  
Cotinine in urine  
5-carboxy-MEPP in urine  
PFOS in serum  
Zn in urine  
Mo in urine

1-HP in urine  
5-OH-MEHP in urine  
MEHP in urine  
MBzP in urine  
Trichloropyridinol in urine  
Sn in urine

Erlangen, 2018/07/07

Prof. Dr. med. H. Drexler

Prof. Dr. rer. nat. Th. Göen

## Supplementary Material

|                                                                                                                                                                                                                                                                                                                                                               |    |
|---------------------------------------------------------------------------------------------------------------------------------------------------------------------------------------------------------------------------------------------------------------------------------------------------------------------------------------------------------------|----|
| <b>Table S1:</b> Questions used to evaluate respiratory and allergic outcomes that form part of the ISAAC-III questionnaire unless indicated elsewhere.....                                                                                                                                                                                                   | 3  |
| <b>Table S2:</b> Spearman correlation coefficients of respiratory and allergic outcomes.....                                                                                                                                                                                                                                                                  | 4  |
| <b>Table S3:</b> Spearman correlation coefficients of averaged maternal specific gravity-adjusted urinary pesticide metabolite concentrations during pregnant with current children's concentration.....                                                                                                                                                      | 5  |
| <b>Table S4:</b> Odds ratios adjusted for child's sex and maternal smoking during pregnancy for each <b>10-fold increase</b> in specific pesticide metabolite concentrations and childhood respiratory outcomes. ISA study at five years of age, Matina County, Costa Rica 2015-2016.....                                                                     | 6  |
| <b>Table S5:</b> Odds ratios adjusted for maternal smoking during pregnancy, child's sex of high ( $\geq P75$ ) specific pesticide exposures and childhood respiratory outcomes, including both <b>prenatal and current exposures</b> in the same model. ISA study at five years of age. Matina County. Costa Rica 2015-2016.....                             | 7  |
| <b>Table S6:</b> Odds ratios adjusted for child's sex and maternal smoking during pregnancy for each <b>10-fold increase</b> in specific pesticide metabolite concentrations and childhood respiratory outcomes, including <b>prenatal and current exposures in the same model</b> . ISA study at five years of age, Matina County, Costa Rica 2015-2016..... | 8  |
| <b>Table S7:</b> Odds ratios adjusted for maternal smoking during pregnancy, child's sex, <b>parity, and maternal history asthma</b> of high ( $\geq P75$ ) specific pesticide exposures and <b>childhood respiratory outcomes</b> . ISA study at five years of age. Matina County. Costa Rica 2015-2016.....                                                 | 9  |
| <b>Table S8:</b> Odds ratios adjusted for maternal smoking during pregnancy, child's sex, <b>parity, and breastfeeding</b> of high ( $\geq P75$ ) specific pesticide exposures and <b>childhood respiratory outcomes</b> . ISA study at five years of age. Matina County. Costa Rica 2015-2016.....                                                           | 9  |
| <b>Table S9:</b> Odds ratios adjusted for <b>current smoking in house</b> , child's sex, and <b>parity</b> of high ( $\geq P75$ ) specific pesticide exposures and <b>childhood respiratory outcomes</b> . ISA study at five years of age. Matina County. Costa Rica 2015-2016.....                                                                           | 10 |
| <b>Table S10:</b> Odds ratios adjusted for child's sex and maternal smoking during pregnancy for each <b>10-fold increase</b> in specific pesticide metabolite concentrations and <b>childhood allergic outcomes</b> . ISA study at five years of age, Matina County, Costa Rica 2015-2016.....                                                               | 11 |
| <b>Table S11:</b> Odds ratios adjusted for maternal smoking during pregnancy, child's sex of high ( $\geq P75$ ) specific pesticide exposures and <b>childhood allergic outcomes</b> , including <b>prenatal and current exposures</b> in the same model. ISA study at five years of age. Matina County. Costa Rica 2015-2016.....                            | 12 |
| <b>Table S12:</b> Odds ratios adjusted for child's sex and maternal smoking during pregnancy for each <b>10-fold increase</b> in specific pesticide metabolite concentrations and <b>childhood allergic outcomes, including prenatal and current exposures</b> in the same model. ISA study at five years of age, Matina County, Costa Rica 2015-2016.....    | 13 |
| <b>Table S13:</b> Odds ratios adjusted for maternal smoking during pregnancy, child's sex, <b>parity, and maternal history of asthma</b> (yes/no), of high ( $\geq P75$ ) specific pesticide exposures and <b>childhood allergic outcomes</b> . ISA study at five years of age. Matina County. Costa Rica 2015-2016.....                                      | 14 |
| <b>Table S14:</b> Odds ratios adjusted for maternal smoking during pregnancy, child's sex, <b>parity, and breastfeeding</b> of high ( $\geq P75$ ) specific pesticide exposures and <b>childhood allergic outcomes</b> . ISA study at five years of age. Matina County. Costa Rica 2015-2016.....                                                             | 15 |
| <b>Table S15:</b> Odds ratios adjusted for <b>current smoking in house</b> , child's sex, and <b>parity</b> of high ( $\geq P75$ ) specific pesticide exposures and <b>childhood allergic outcomes</b> . ISA study at five years of age. Matina County. Costa Rica 2015-2016.....                                                                             | 16 |

|                                                                                                                                                                                                                                                                     |    |
|---------------------------------------------------------------------------------------------------------------------------------------------------------------------------------------------------------------------------------------------------------------------|----|
| <b>Table S16:</b> Odds ratios adjusted for maternal smoking during pregnancy and child's sex for recent environmental exposures and current <b>respiratory outcomes</b> in 293 five-year-old children from the ISA study. Matina County. Costa Rica. 2015-2016..... | 17 |
| <b>Table S17:</b> Odds ratios adjusted for maternal smoking during pregnancy and child's sex for recent environmental exposures and current <b>allergic outcomes</b> in 293 five-year-old children from the ISA study. Matina County. Costa Rica. 2015-2016.....    | 18 |



**Table S1:** Questions used to evaluate respiratory and allergic outcomes that form part of the ISAAC-III questionnaire<sup>1</sup> unless indicated otherwise

| Type of outcome     | Outcome                                     | Definition: A positive answer to the following questions:                                                                                            |
|---------------------|---------------------------------------------|------------------------------------------------------------------------------------------------------------------------------------------------------|
| Respiratory, asthma | Ever wheeze                                 | Has your child <u>ever</u> had wheezing or whistling in the chest at any time in the past?                                                           |
|                     | Current wheeze*                             | Has your child had wheezing or whistling in the chest <u>in the past 12 months</u> ?                                                                 |
|                     | Severity of asthma symptoms                 | How many attacks of wheezing has your child had <u>in the past 12 months</u> ?                                                                       |
|                     | Severity of asthma symptoms                 | <u>In the past 12 months</u> , how often, on average, has your child's sleep been disturbed due to wheezing?                                         |
|                     | Severity of asthma symptoms                 | <u>In the past 12 months</u> , has wheezing ever been severe enough to limit your child's speech to only one or two words at a time between breaths? |
|                     | Ever doctor-diagnosed asthma*               | Has your child ever been diagnosed with asthma by a doctor? **                                                                                       |
| Respiratory, LRTI   | Current dry cough at night*                 | In the past 12 months, has your child had a dry cough at night, apart from a cough associated with a cold or chest infection?                        |
|                     | Ever LRTI                                   | Has your child <u>ever</u> been diagnosed with pneumonia or chest infections (bronchitis, bronchiolitis), at any point in their life? **             |
| Allergic, Rhinitis  | Current LRTI*                               | Has your child presented any episodes of pneumonia or chest infection (bronchitis, bronchiolitis) <u>in the last 12 months</u> ? **                  |
|                     | Ever nasal allergies (allergic rhinitis)    | Has your child <u>ever</u> had a problem with sneezing, or a runny, or blocked nose when he/she DID NOT have a cold or the flu?                      |
|                     | Current nasal allergies                     | <u>In the past 12 months</u> , has your child had a problem with sneezing, or a runny, or blocked nose when he/she DID NOT have a cold or the flu?   |
| Allergic, Eczema    | Current allergic rhinoconjunctivitis        | <u>In the past 12 months</u> , has this nose problem been accompanied by itchy-watery eyes?                                                          |
|                     | Ever itchy rash (symptoms of atopic eczema) | Has your child ever had an itchy rash which was coming and going for at least six months?                                                            |
|                     | Current itchy rash                          | Has your child had this itchy rash at any time in the past 12 months?                                                                                |
|                     | Ever doctor-diagnosed eczema*               | Has your child ever been diagnosed with, or said to have, eczema or skin allergy? **                                                                 |

*Abbreviations:* LRTI: lower respiratory tract infection

\*Selected for epidemiological analysis

\*\* Not part of ISAAC-III questionnaire

<sup>1</sup> Mallol J, Crane J, von Mutius E, *et al.* The International Study of Asthma and Allergies in Childhood (ISAAC) Phase Three: A global synthesis. *Allergol Immunopathol (Madr)* 2013;**41**:73–85. doi:10.1016/j.aller.2012.03.001

**Table S2:** Spearman correlation coefficients of respiratory and allergic outcomes.

| <b>Outcome</b>                           | <b>Ever doctor -<br/>diagnosed<br/>asthma</b> | <b>Current<br/>Dry<br/>Cough</b> | <b>Curre<br/>nt<br/>LRTI</b> | <b>Current Nasal<br/>Allergies<br/>(Rhinitis)</b> | <b>Current Itchy<br/>Rash (Atopic<br/>Eczema)</b> | <b>Ever doctor-<br/>diagnosed<br/>Eczema</b> |
|------------------------------------------|-----------------------------------------------|----------------------------------|------------------------------|---------------------------------------------------|---------------------------------------------------|----------------------------------------------|
| Current wheeze                           | 0.49                                          | 0.31                             | 0.16                         | 0.19                                              | 0.15                                              | -0.04                                        |
| Ever doctor -<br>diagnosed<br>Asthma     |                                               | 0.16                             | 0.16                         | 0.21                                              | 0.10                                              | -0.02                                        |
| Current Cough                            |                                               |                                  | 0.18                         | 0.35                                              | 0.10                                              | 0,02                                         |
| Current LRTI                             |                                               |                                  |                              | 0.16                                              | 0.20                                              | 0.06                                         |
| Current Nasal<br>Allergies<br>(Rhinitis) |                                               |                                  |                              |                                                   | 0.05                                              | 0.02                                         |
| Current itchy<br>rash (Atopic<br>Eczema) |                                               |                                  |                              |                                                   |                                                   | 0.21                                         |

**Table S3:** Spearman correlation coefficients of averaged maternal specific gravity-adjusted urinary pesticide metabolite concentrations during pregnant with current children's concentration.

| Averaged prenatal concentration in Mother's | Current child concentrations |       |       |       |       |       |       |              |
|---------------------------------------------|------------------------------|-------|-------|-------|-------|-------|-------|--------------|
|                                             | TCP                          | ETU   | OHP   | OHT   | 2,4-D | 3PBA  | DCCA  | ΣPyrethroid* |
| TCP                                         | 0.07                         | 0.05  | 0.06  | -0.04 | 0.02  | -0.03 | -0.00 | -0.03        |
| ETU                                         | 0.10                         | 0.12  | 0.06  | -0.02 | 0.02  | -0.03 | -0.06 | -0.04        |
| OHP                                         | 0.13                         | 0.01  | 0.27  | -0.05 | 0.06  | -0.03 | -0.04 | -0.04        |
| OHT                                         | 0.07                         | 0.11  | -0.00 | 0.25  | 0.04  | 0.07  | 0.03  | 0.05         |
| 2,4-D                                       | 0.03                         | -0.11 | -0.02 | -0.17 | 0.20  | -0.01 | 0.03  | 0.02         |
| 3PBA                                        | 0.13                         | 0.00  | -0.06 | 0.00  | 0.05  | 0.14  | 0.12  | 0.13         |
| DCCA                                        | 0.17                         | -0.07 | -0.00 | -0.02 | -0.01 | 0.06  | 0.06  | 0.06         |
| Σ Pyrethroid*                               | 0.16                         | -0.04 | -0.03 | -0.01 | 0.02  | 0.09  | 0.08  | 0.08         |

*Abbreviations:* TCP: 3,5,6 trichloro-2-pyridinol, ETU: Ethylenethiourea, OHP: Hydroxypyrimethanil, OHT: 5-hydroxythiabenzazole, 2,4-D: 2,4-Dichlorophenoxyacetic acid 3-PBA: 3-Phenoxybenzoic acid, DCCA: 3-(2,2-dichlorovinyl)-2,2-dimethyl-cyclopropane-1-carboxylic acid

\*Σ Pyrethroid: Sum of PBA and DCCA

**Table S4:** Odds ratios adjusted for child's sex and maternal smoking during pregnancy for each **10-fold increase** in specific pesticide metabolite concentrations and childhood respiratory outcomes. ISA study at five years of age, Matina County, Costa Rica 2015-2016

|                                               | Current Wheeze<br>(N = 62) |        |      | Ever doctor-<br>diagnosed Asthma<br>(N= 37) |        |      | Current Dry<br>Cough<br>(N= 118) |        |      | Current LRTI<br>(N=15) |        |       |
|-----------------------------------------------|----------------------------|--------|------|---------------------------------------------|--------|------|----------------------------------|--------|------|------------------------|--------|-------|
|                                               | OR                         | 95% CI |      | OR                                          | 95% CI |      | OR                               | 95% CI |      | OR                     | 95% CI |       |
| <b><i>Prenatal metabolites* (n = 303)</i></b> |                            |        |      |                                             |        |      |                                  |        |      |                        |        |       |
| TCP                                           | 1.09                       | 0.41   | 2.76 | 0.81                                        | 0.22   | 2.58 | 0.93                             | 0.41   | 2.05 | 2.29                   | 0.43   | 9.47  |
| ETU                                           | 0.88                       | 0.26   | 2.73 | 0.42                                        | 0.08   | 1.74 | 1.40                             | 0.53   | 3.80 | 0.30                   | 0.02   | 2.76  |
| OHP                                           | 0.99                       | 0.63   | 1.53 | 0.97                                        | 0.55   | 1.65 | 1.04                             | 0.72   | 1.49 | 0.97                   | 0.41   | 2.07  |
| OHT                                           | 0.89                       | 0.63   | 1.22 | 0.86                                        | 0.56   | 1.28 | 1.15                             | 0.89   | 1.50 | 0.80                   | 0.39   | 1.44  |
| 2,4-D                                         | 1.40                       | 0.67   | 2.78 | 0.41                                        | 0.12   | 1.19 | 0.92                             | 0.48   | 1.70 | 1.02                   | 0.21   | 3.35  |
| 3PBA                                          | 1.91                       | 0.86   | 4.26 | 0.46                                        | 0.15   | 1.29 | 1.25                             | 0.64   | 2.44 | 0.85                   | 0.18   | 3.62  |
| DCCA                                          | 1.02                       | 0.47   | 2.20 | 0.35                                        | 0.12   | 0.93 | 0.78                             | 0.41   | 1.47 | 1.55                   | 0.38   | 6.23  |
| ∑ Pyrethroid**                                | 1.32                       | 0.58   | 2.99 | 0.33                                        | 0.11   | 0.96 | 0.96                             | 0.49   | 1.90 | 1.26                   | 0.27   | 5.41  |
| <b><i>Child metabolites* (n = 293)</i></b>    |                            |        |      |                                             |        |      |                                  |        |      |                        |        |       |
| TCP                                           | 0.60                       | 0.22   | 1.53 | 0.83                                        | 0.25   | 2.56 | 0.48                             | 0.21   | 1.06 | 1.79                   | 0.33   | 8.57  |
| ETU                                           | 0.86                       | 0.43   | 1.74 | 0.68                                        | 0.29   | 1.62 | 0.94                             | 0.52   | 1.69 | 2.70                   | 0.72   | 10.64 |
| OHP                                           | 1.30                       | 0.85   | 1.95 | 1.09                                        | 0.64   | 1.81 | 0.96                             | 0.67   | 1.36 | 1.45                   | 0.68   | 2.81  |
| OHT                                           | 1.08                       | 0.72   | 1.59 | 1.18                                        | 0.72   | 1.90 | 0.98                             | 0.70   | 1.36 | 1.48                   | 0.73   | 2.85  |
| 2,4-D                                         | 1.15                       | 0.58   | 2.17 | 1.21                                        | 0.51   | 2.57 | 0.75                             | 0.41   | 1.30 | 0.82                   | 0.20   | 2.53  |
| 3PBA                                          | 1.84                       | 0.96   | 3.62 | 2.17                                        | 0.96   | 5.07 | 1.36                             | 0.79   | 2.34 | 3.81                   | 1.13   | 13.68 |
| DCCA                                          | 1.96                       | 0.98   | 3.94 | 2.16                                        | 0.92   | 5.09 | 1.28                             | 0.72   | 2.28 | 3.18                   | 0.94   | 10.77 |
| ∑ Pyrethroid**                                | 1.99                       | 0.98   | 4.07 | 2.30                                        | 0.96   | 5.57 | 1.35                             | 0.75   | 2.43 | 3.74                   | 1.06   | 13.46 |

*Abbreviations:* OR: Odds ratios, CI: Confidence Intervals, TCP: 3,5,6 trichloro-2-pyridinol, ETU: Ethylene thiourea, OHP: Hydroxypyrimethanil, OHT: 5-hydroxythiabendazole, 2,4-D: 2,4-Dichlorophenoxyacetic acid 3-PBA: 3-Phenoxybenzoic acid, DCCA: 3-(2,2-dichlorovinyl)-2,2-dimethyl-cyclopropane-1-carboxylic acid

\*Variables dichotomized at 75th percentile; Reference: Below 75th percentile

\*\* ∑ Pyrethroid: Sum of PBA and DCCA

**Table S5:** Odds ratios adjusted for maternal smoking during pregnancy, child's sex of high ( $\geq P75$ ) specific pesticide exposures and childhood respiratory outcomes, including both **prenatal and current exposures** in the same model. ISA study at five years of age. Matina County. Costa Rica 2015-2016

|                                               | Current Wheeze<br>(N = 62) |        |      | Ever doctor-<br>diagnosed Asthma<br>(N= 37) |        |      | Current Dry<br>Cough<br>(N= 118) |        |      | Current LRTI<br>(N=15) |        |      |
|-----------------------------------------------|----------------------------|--------|------|---------------------------------------------|--------|------|----------------------------------|--------|------|------------------------|--------|------|
|                                               | OR                         | 95% CI |      | OR                                          | 95% CI |      | OR                               | 95% CI |      | OR                     | 95% CI |      |
| <b><i>Prenatal metabolites* (n = 303)</i></b> |                            |        |      |                                             |        |      |                                  |        |      |                        |        |      |
| TCP                                           | 1.50                       | 0.79   | 2.78 | 0.86                                        | 0.36   | 1.91 | 1.14                             | 0.66   | 1.95 | 1.00                   | 0.27   | 3.07 |
| ETU                                           | 1.29                       | 0.66   | 2.42 | 0.90                                        | 0.36   | 2.02 | 0.95                             | 0.55   | 1.64 | 1.04                   | 0.28   | 3.19 |
| OHP                                           | 0.52                       | 0.24   | 1.06 | 0.69                                        | 0.26   | 1.58 | 1.03                             | 0.59   | 1.77 | 0.72                   | 0.16   | 2.38 |
| OHT                                           | 0.63                       | 0.30   | 1.25 | 0.58                                        | 0.22   | 1.37 | 1.16                             | 0.67   | 2.01 | 0.35                   | 0.05   | 1.37 |
| 2.4-D                                         | 1.30                       | 0.66   | 2.49 | 0.51                                        | 0.17   | 1.28 | 0.96                             | 0.54   | 1.69 | 1.37                   | 0.39   | 4.24 |
| 3PBA                                          | 1.12                       | 0.58   | 2.12 | 0.50                                        | 0.18   | 1.20 | 1.13                             | 0.65   | 1.95 | 0.65                   | 0.14   | 2.15 |
| DCCA                                          | 0.82                       | 0.40   | 1.58 | 0.21                                        | 0.05   | 0.63 | 0.78                             | 0.44   | 1.36 | 1.03                   | 0.27   | 3.14 |
| $\Sigma$ Pyrethroid***                        | 1.05                       | 0.53   | 2.00 | 0.31                                        | 0.09   | 0.84 | 0.92                             | 0.52   | 1.59 | 1.01                   | 0.27   | 3.12 |
| <b><i>Child metabolites* (n = 293)</i></b>    |                            |        |      |                                             |        |      |                                  |        |      |                        |        |      |
| TCP                                           | 0.92                       | 0.46   | 1.76 | 1.15                                        | 0.50   | 2.48 | 0.78                             | 0.44   | 1.34 | 2.05                   | 0.66   | 5.91 |
| ETU                                           | 0.57                       | 0.26   | 1.14 | 0.67                                        | 0.26   | 1.54 | 0.94                             | 0.54   | 1.62 | 2.08                   | 0.67   | 6.03 |
| OHP                                           | 1.26                       | 0.65   | 2.37 | 1.43                                        | 0.64   | 3.06 | 1.28                             | 0.74   | 2.20 | 2.13                   | 0.69   | 6.16 |
| OHT                                           | 1.27                       | 0.65   | 2.42 | 1.98                                        | 0.90   | 4.23 | 0.88                             | 0.50   | 1.53 | 2.40                   | 0.76   | 7.08 |
| 2.4-D                                         | 0.78                       | 0.38   | 1.54 | 0.63                                        | 0.22   | 1.54 | 0.77                             | 0.43   | 1.35 | 1.35                   | 0.39   | 4.16 |
| 3PBA                                          | 1.71                       | 0.91   | 3.15 | 1.82                                        | 0.83   | 3.83 | 1.40                             | 0.81   | 2.39 | 2.80                   | 0.94   | 8.17 |
| DCCA                                          | 1.98                       | 1.06   | 3.64 | 2.29                                        | 1.06   | 4.86 | 1.37                             | 0.80   | 2.36 | 2.06                   | 0.67   | 5.94 |
| $\Sigma$ Pyrethroid***                        | 2.37                       | 1.28   | 4.34 | 2.22                                        | 1.03   | 4.69 | 1.59                             | 0.93   | 2.73 | 2.78                   | 0.94   | 8.06 |

Abbreviations: OR: Odds ratios. CI: Confidence Intervals

\*Variables dichotomized at 75th percentile; Reference: Below 75th percentile

\*\* $\Sigma$  Pyrethroid: Sum of PBA and DCCA

**Table S6:** Odds ratios adjusted for child's sex and maternal smoking during pregnancy for each **10-fold increase** in specific pesticide metabolite concentrations and childhood respiratory outcomes, including **prenatal and current exposures in the same model**. ISA study at five years of age, Matina County, Costa Rica 2015-2016

|                                               | Current Wheeze<br>(N = 62) |        |      | Ever doctor-<br>diagnosed Asthma<br>(N= 37) |        |      | Current Dry<br>Cough<br>(N= 118) |        |      | Current LRTI<br>(N=15) |        |       |
|-----------------------------------------------|----------------------------|--------|------|---------------------------------------------|--------|------|----------------------------------|--------|------|------------------------|--------|-------|
|                                               | OR**                       | 95% CI |      | OR**                                        | 95% CI |      | OR**                             | 95% CI |      | OR**                   | 95% CI |       |
| <b><i>Prenatal metabolites* (n = 303)</i></b> |                            |        |      |                                             |        |      |                                  |        |      |                        |        |       |
| TCP                                           | 1.09                       | 0.40   | 2.81 | 0.80                                        | 0.21   | 2.59 | 1.01                             | 0.44   | 2.26 | 2.12                   | 0.39   | 8.81  |
| ETU                                           | 0.88                       | 0.26   | 2.78 | 0.43                                        | 0.08   | 1.84 | 1.47                             | 0.54   | 4.02 | 0.20                   | 0.01   | 2.02  |
| OHP                                           | 0.91                       | 0.56   | 1.42 | 0.88                                        | 0.48   | 1.54 | 1.05                             | 0.72   | 1.52 | 0.93                   | 0.38   | 2.01  |
| OHT                                           | 0.85                       | 0.60   | 1.18 | 0.80                                        | 0.51   | 1.21 | 1.18                             | 0.90   | 1.56 | 0.73                   | 0.36   | 1.33  |
| 2,4-D                                         | 1.35                       | 0.64   | 2.73 | 0.37                                        | 0.10   | 1.10 | 0.99                             | 0.52   | 1.86 | 1.04                   | 0.21   | 3.47  |
| 3PBA                                          | 1.85                       | 0.79   | 4.33 | 0.33                                        | 0.10   | 1.02 | 1.26                             | 0.62   | 2.55 | 0.71                   | 0.14   | 3.37  |
| DCCA                                          | 0.99                       | 0.44   | 2.22 | 0.30                                        | 0.10   | 0.84 | 0.83                             | 0.43   | 1.63 | 1.49                   | 0.34   | 6.42  |
| ∑ Pyrethroid**                                | 1.29                       | 0.54   | 3.05 | 0.26                                        | 0.08   | 0.81 | 1.02                             | 0.50   | 2.08 | 1.18                   | 0.24   | 5.51  |
| <b><i>Child metabolites* (n = 293)</i></b>    |                            |        |      |                                             |        |      |                                  |        |      |                        |        |       |
| TCP                                           | 0.59                       | 0.22   | 1.52 | 0.84                                        | 0.25   | 2.59 | 0.48                             | 0.21   | 1.06 | 1.70                   | 0.31   | 8.34  |
| ETU                                           | 0.87                       | 0.43   | 1.77 | 0.72                                        | 0.30   | 1.77 | 0.91                             | 0.51   | 1.65 | 3.36                   | 0.83   | 14.84 |
| OHP                                           | 1.32                       | 0.86   | 1.99 | 1.12                                        | 0.64   | 1.85 | 0.95                             | 0.66   | 1.36 | 1.46                   | 0.68   | 2.83  |
| OHT                                           | 1.13                       | 0.75   | 1.69 | 1.25                                        | 0.75   | 2.03 | 0.93                             | 0.65   | 1.30 | 1.60                   | 0.79   | 3.12  |
| 2,4-D                                         | 1.10                       | 0.54   | 2.09 | 1.39                                        | 0.58   | 3.01 | 0.75                             | 0.41   | 1.32 | 0.81                   | 0.19   | 2.57  |
| 3PBA                                          | 1.75                       | 0.90   | 3.46 | 2.42                                        | 1.06   | 5.68 | 1.32                             | 0.77   | 2.30 | 3.92                   | 1.16   | 14.08 |
| DCCA                                          | 1.96                       | 0.98   | 3.95 | 2.37                                        | 1.00   | 5.69 | 1.30                             | 0.73   | 2.32 | 3.09                   | 0.90   | 10.50 |
| ∑ Pyrethroid**                                | 1.95                       | 0.96   | 4.01 | 2.53                                        | 1.05   | 6.23 | 1.34                             | 0.75   | 2.43 | 3.70                   | 1.04   | 13.37 |

Abbreviations: OR: Odds ratios, CI: Confidence Intervals

\*\* ∑ Pyrethroid: Sum of PBA and DCCA

**Table S8:** Odds ratios adjusted for maternal smoking during pregnancy, child's sex, parity, and breastfeeding history (as the reference) as predictors of specific pesticide childhood respiratory and respiratory outcomes/attacks at age 6 years of age in a cohort of rural Ugandan children 2015-2016

|                                        | Current Wheeze<br>(N = 62) |        |      | Ever doctor-<br>diagnosed Asthma<br>(N= 37) |        |      | Current Dry<br>Cough<br>(N= 118) |        |      | Current LRTI<br>(N=15) |        |      |
|----------------------------------------|----------------------------|--------|------|---------------------------------------------|--------|------|----------------------------------|--------|------|------------------------|--------|------|
|                                        | OR*                        | 95% CI |      | OR*                                         | 95% CI |      | OR*                              | 95% CI |      | OR*                    | 95% CI |      |
| <b>Prenatal metabolites* (n = 303)</b> |                            |        |      |                                             |        |      |                                  |        |      |                        |        |      |
| TCP                                    | 1.62                       | 0.84   | 3.02 | 0.89                                        | 0.36   | 1.96 | 1.10                             | 0.64   | 1.88 | 1.09                   | 0.29   | 3.30 |
| ETU                                    | 1.20                       | 0.68   | 2.19 | 0.82                                        | 0.33   | 1.88 | 0.95                             | 0.52   | 1.66 | 1.14                   | 0.31   | 3.54 |
| OHP                                    | 0.54                       | 0.24   | 1.08 | 0.78                                        | 0.30   | 1.88 | 1.04                             | 0.60   | 1.78 | 0.76                   | 0.17   | 2.47 |
| OHT                                    | 0.68                       | 0.30   | 1.26 | 0.69                                        | 0.23   | 1.47 | 1.06                             | 0.64   | 1.88 | 0.43                   | 0.07   | 1.63 |
| 2,4-D                                  | 1.38                       | 0.66   | 2.66 | 0.40                                        | 0.17   | 1.20 | 0.86                             | 0.49   | 1.46 | 1.48                   | 0.44   | 4.36 |
| 3PBA                                   | 1.22                       | 0.68   | 2.19 | 0.55                                        | 0.21   | 1.38 | 1.26                             | 0.60   | 2.09 | 0.72                   | 0.16   | 2.40 |
| DCCA                                   | 0.88                       | 0.40   | 1.50 | 0.20                                        | 0.05   | 0.64 | 0.74                             | 0.43   | 1.38 | 1.06                   | 0.28   | 3.23 |
| ∑ Pyrethroid***                        | 1.22                       | 0.62   | 2.30 | 0.39                                        | 0.13   | 0.90 | 0.96                             | 0.55   | 1.66 | 1.04                   | 0.28   | 3.20 |
| <b>Child metabolites* (n = 293)</b>    |                            |        |      |                                             |        |      |                                  |        |      |                        |        |      |
| TCP                                    | 0.90                       | 0.45   | 1.72 | 1.11                                        | 0.48   | 2.40 | 0.78                             | 0.44   | 1.36 | 2.09                   | 0.68   | 6.04 |
| ETU                                    | 0.56                       | 0.26   | 1.14 | 0.64                                        | 0.25   | 1.49 | 0.94                             | 0.54   | 1.62 | 2.08                   | 0.68   | 6.03 |
| OHP                                    | 1.48                       | 0.73   | 2.87 | 1.60                                        | 0.69   | 3.42 | 1.35                             | 0.78   | 2.35 | 2.04                   | 0.65   | 6.03 |
| OHT                                    | 1.34                       | 0.63   | 2.50 | 1.85                                        | 0.89   | 4.44 | 0.95                             | 0.52   | 1.64 | 2.01                   | 0.65   | 5.83 |
| 2,4-D                                  | 0.84                       | 0.40   | 1.64 | 0.53                                        | 0.19   | 1.27 | 0.79                             | 0.44   | 1.34 | 1.50                   | 0.46   | 4.44 |
| 3PBA                                   | 1.66                       | 0.87   | 3.12 | 1.80                                        | 0.82   | 3.64 | 1.36                             | 0.88   | 2.32 | 2.73                   | 0.90   | 8.00 |
| DCCA                                   | 1.88                       | 1.00   | 3.49 | 2.05                                        | 0.96   | 4.38 | 1.34                             | 0.76   | 2.26 | 2.07                   | 0.67   | 5.99 |
| ∑ Pyrethroid***                        | 2.40                       | 1.28   | 4.46 | 2.10                                        | 0.98   | 4.89 | 1.55                             | 0.90   | 2.66 | 2.78                   | 0.94   | 8.08 |

Abbreviations: OR: Odds Ratio; CI: Confidence Intervals

\*Variables dichotomized at 75th percentile; Reference: Below 75th percentile

\*\*∑ Pyrethroid: Sum of 3PBA and DCCA

**Table S9:** Odds ratios adjusted for **current smoking in house**, **child's sex**, and **parity** of high ( $\geq P75$ ) specific pesticide exposures and **childhood respiratory outcomes**. ISA study at five years of age. Matina County. Costa Rica 2015-2016

|                                               | Current Wheeze<br>(N = 62) |        |      | Ever Asthma<br>(N= 37) |        |      | Current Dry Cough<br>(N= 118) |        |      | Current LRTI<br>(N=15) |        |      |
|-----------------------------------------------|----------------------------|--------|------|------------------------|--------|------|-------------------------------|--------|------|------------------------|--------|------|
|                                               | OR**                       | 95% CI |      | OR**                   | 95% CI |      | OR**                          | 95% CI |      | OR**                   | 95% CI |      |
| <b><i>Prenatal metabolites* (n = 303)</i></b> |                            |        |      |                        |        |      |                               |        |      |                        |        |      |
| TCP                                           | 1.55                       | 0.82   | 2.86 | 0.90                   | 0.38   | 1.96 | 1.17                          | 0.68   | 2.00 | 1.00                   | 0.27   | 3.09 |
| ETU                                           | 1.09                       | 0.56   | 2.04 | 0.76                   | 0.31   | 1.71 | 0.88                          | 0.51   | 1.51 | 1.19                   | 0.32   | 3.70 |
| OHP                                           | 0.57                       | 0.26   | 1.13 | 0.81                   | 0.33   | 1.81 | 1.01                          | 0.59   | 1.73 | 0.82                   | 0.18   | 2.75 |
| OHT                                           | 0.62                       | 0.30   | 1.22 | 0.64                   | 0.25   | 1.47 | 1.07                          | 0.62   | 1.82 | 0.46                   | 0.07   | 1.76 |
| 2.4-D                                         | 1.36                       | 0.71   | 2.54 | 0.55                   | 0.20   | 1.30 | 0.89                          | 0.51   | 1.52 | 1.53                   | 0.46   | 4.51 |
| 3PBA                                          | 1.18                       | 0.61   | 2.20 | 0.61                   | 0.23   | 1.40 | 1.18                          | 0.68   | 2.01 | 0.74                   | 0.16   | 2.47 |
| DCCA                                          | 0.82                       | 0.41   | 1.57 | 0.22                   | 0.05   | 0.64 | 0.76                          | 0.43   | 1.30 | 1.05                   | 0.28   | 3.23 |
| $\Sigma$ Pyrethroid***                        | 1.12                       | 0.58   | 2.10 | 0.40                   | 0.13   | 0.99 | 0.93                          | 0.54   | 1.59 | 1.03                   | 0.27   | 3.18 |
| <b><i>Child metabolites* (n = 293)</i></b>    |                            |        |      |                        |        |      |                               |        |      |                        |        |      |
| TCP                                           | 0.96                       | 0.48   | 1.83 | 1.24                   | 0.54   | 2.70 | 0.75                          | 0.42   | 1.30 | 2.59                   | 0.81   | 7.94 |
| ETU                                           | 0.57                       | 0.27   | 1.14 | 0.65                   | 0.25   | 1.50 | 0.95                          | 0.55   | 1.64 | 2.05                   | 0.66   | 5.99 |
| OHP                                           | 1.36                       | 0.70   | 2.60 | 1.53                   | 0.68   | 3.32 | 1.28                          | 0.74   | 2.20 | 2.09                   | 0.66   | 6.26 |
| OHT                                           | 1.23                       | 0.64   | 2.32 | 1.93                   | 0.89   | 4.06 | 0.91                          | 0.52   | 1.56 | 2.09                   | 0.67   | 6.12 |
| 2.4-D                                         | 0.76                       | 0.38   | 1.48 | 0.47                   | 0.17   | 1.15 | 0.79                          | 0.45   | 1.37 | 1.42                   | 0.42   | 4.25 |
| 3PBA                                          | 1.77                       | 0.94   | 3.29 | 1.72                   | 0.79   | 3.62 | 1.51                          | 0.88   | 2.61 | 2.46                   | 0.82   | 7.20 |
| DCCA                                          | 1.90                       | 1.02   | 3.51 | 1.97                   | 0.92   | 4.10 | 1.41                          | 0.82   | 2.43 | 1.91                   | 0.61   | 5.57 |
| $\Sigma$ Pyrethroid***                        | 2.38                       | 1.28   | 4.38 | 2.00                   | 0.93   | 4.17 | 1.66                          | 0.96   | 2.86 | 2.59                   | 0.86   | 7.58 |

Abbreviations: OR: Odds ratios. CI: Confidence Intervals

\*Variables dichotomized at 75th percentile; Reference: Below 75th percentile

\*\* $\Sigma$  Pyrethroid: Sum of PBA and DCCA



**Table S10.** Odds ratios adjusted for child's sex and maternal smoking during pregnancy for each **10-fold increase** in specific pesticide metabolite concentrations and **childhood allergic outcomes**. ISA study at five years of age, Matina County, Costa Rica 2015-2016

|                                       | Current Nasal Allergies<br>(Allergic Rhinitis)<br>(n = 63) |        |      | Current Itchy Rash<br>(Atopic Eczema)<br>(n = 39) |        |      | Ever doctor-<br>diagnosed Eczema<br>(n = 21) |        |      |
|---------------------------------------|------------------------------------------------------------|--------|------|---------------------------------------------------|--------|------|----------------------------------------------|--------|------|
|                                       | OR                                                         | 95% CI |      | OR                                                | 95% CI |      | OR                                           | 95% CI |      |
| <b>Prenatal metabolites (n = 303)</b> |                                                            |        |      |                                                   |        |      |                                              |        |      |
| TCP                                   | 0.63                                                       | 0.22   | 1.66 | 1.36                                              | 0.42   | 4.00 | 1.45                                         | 0.31   | 5.54 |
| ETU                                   | 1.06                                                       | 0.32   | 3.28 | 0.91                                              | 0.22   | 3.44 | 0.87                                         | 0.11   | 5.11 |
| OHP                                   | 1.40                                                       | 0.92   | 2.13 | 0.99                                              | 0.56   | 1.66 | 1.19                                         | 0.59   | 2.25 |
| OHT                                   | 0.86                                                       | 0.61   | 1.18 | 1.20                                              | 0.82   | 1.71 | 1.04                                         | 0.61   | 1.67 |
| 2,4-D                                 | 1.24                                                       | 0.59   | 2.46 | 0.82                                              | 0.29   | 1.99 | 0.45                                         | 0.09   | 1.63 |
| 3PBA                                  | 1.50                                                       | 0.68   | 3.30 | 0.54                                              | 0.19   | 1.47 | 2.19                                         | 0.62   | 7.40 |
| DCCA                                  | 1.57                                                       | 0.73   | 3.38 | 0.69                                              | 0.26   | 1.76 | 1.86                                         | 0.55   | 6.22 |
| ∑ Pyrethroid**                        | 1.52                                                       | 0.68   | 3.41 | 0.57                                              | 0.20   | 1.57 | 2.15                                         | 0.59   | 7.58 |
| <b>Child metabolites (n = 293)</b>    |                                                            |        |      |                                                   |        |      |                                              |        |      |
| TCP                                   | 0.80                                                       | 0.31   | 2.00 | 0.77                                              | 0.24   | 2.34 | 1.35                                         | 0.31   | 5.29 |
| ETU                                   | 0.65                                                       | 0.32   | 1.30 | 1.60                                              | 0.68   | 3.85 | 0.44                                         | 0.15   | 1.30 |
| OHP                                   | 1.10                                                       | 0.72   | 1.66 | 1.20                                              | 0.72   | 1.95 | 0.84                                         | 0.40   | 1.64 |
| OHT                                   | 1.04                                                       | 0.69   | 1.53 | 1.61                                              | 1.01   | 2.53 | 0.83                                         | 0.41   | 1.54 |
| 2,4-D                                 | 1.00                                                       | 0.50   | 1.90 | 1.13                                              | 0.48   | 2.38 | 0.93                                         | 0.28   | 2.45 |
| 3PBA                                  | 0.94                                                       | 0.49   | 1.80 | 3.00                                              | 1.34   | 6.99 | 1.41                                         | 0.51   | 3.96 |
| DCCA                                  | 0.95                                                       | 0.48   | 1.89 | 2.37                                              | 1.04   | 5.47 | 1.83                                         | 0.62   | 5.26 |
| ∑ Pyrethroid**                        | 0.91                                                       | 0.45   | 1.84 | 2.90                                              | 1.24   | 6.92 | 1.71                                         | 0.57   | 5.11 |

Abbreviations: OR: Odds ratios, CI: Confidence Intervals

\*\* ∑ Pyrethroid: Sum of PBA and DCCA

**Table S11:** Odds ratios adjusted for maternal smoking during pregnancy, child's sex of high ( $\geq P75$ ) specific pesticide exposures and **childhood allergic outcomes**, including **prenatal and current exposures** in the same model. ISA study at five years of age. Matina County. Costa Rica 2015-2016

|                                        | Current Nasal Allergies<br>(Allergic Rhinitis)<br>(n = 63) |        |      | Current Itchy Rash<br>(Atopic Eczema)<br>(n = 39) |        |      | Ever doctor-diagnosed<br>Eczema<br>(n = 21) |        |      |
|----------------------------------------|------------------------------------------------------------|--------|------|---------------------------------------------------|--------|------|---------------------------------------------|--------|------|
|                                        | OR**                                                       | 95% CI |      | OR**                                              | 95% CI |      | OR**                                        | 95% CI |      |
| <b>Prenatal metabolites* (n = 303)</b> |                                                            |        |      |                                                   |        |      |                                             |        |      |
| TCP                                    | 0.50                                                       | 0.23   | 1.01 | 0.76                                              | 0.31   | 1.69 | 0.66                                        | 0.18   | 1.86 |
| ETU                                    | 0.78                                                       | 0.38   | 1.52 | 0.63                                              | 0.24   | 1.46 | 0.70                                        | 0.20   | 1.99 |
| OHP                                    | 1.20                                                       | 0.62   | 2.23 | 1.07                                              | 0.46   | 2.29 | 2.51                                        | 0.98   | 6.23 |
| OHT                                    | 0.64                                                       | 0.30   | 1.26 | 1.26                                              | 0.56   | 2.66 | 1.09                                        | 0.34   | 2.97 |
| 2.4-D                                  | 1.43                                                       | 0.74   | 2.72 | 1.15                                              | 0.50   | 2.51 | 0.88                                        | 0.27   | 2.44 |
| 3PBA                                   | 1.10                                                       | 0.57   | 2.08 | 0.51                                              | 0.19   | 1.19 | 1.55                                        | 0.56   | 3.91 |
| DCCA                                   | 0.99                                                       | 0.50   | 1.88 | 1.13                                              | 0.50   | 2.41 | 1.21                                        | 0.42   | 3.12 |
| $\Sigma$ Pyrethroid***                 | 0.90                                                       | 0.45   | 1.72 | 0.81                                              | 0.33   | 1.80 | 1.58                                        | 0.57   | 4.00 |
| <b>Child metabolites* (n = 293)</b>    |                                                            |        |      |                                                   |        |      |                                             |        |      |
| TCP                                    | 0.99                                                       | 0.50   | 1.87 | 0.59                                              | 0.22   | 1.35 | 0.93                                        | 0.30   | 2.48 |
| ETU                                    | 0.52                                                       | 0.24   | 1.05 | 1.41                                              | 0.64   | 2.97 | 0.30                                        | 0.05   | 1.07 |
| OHP                                    | 1.30                                                       | 0.68   | 2.42 | 1.23                                              | 0.55   | 2.61 | 0.62                                        | 0.17   | 1.78 |
| OHT                                    | 1.28                                                       | 0.66   | 2.43 | 1.50                                              | 0.69   | 3.15 | 0.29                                        | 0.04   | 1.04 |
| 2.4-D                                  | 1.08                                                       | 0.54   | 2.06 | 1.12                                              | 0.48   | 2.43 | 1.28                                        | 0.43   | 3.42 |
| 3PBA                                   | 0.85                                                       | 0.42   | 1.62 | 2.71                                              | 1.30   | 5.58 | 1.19                                        | 0.41   | 3.09 |
| DCCA                                   | 0.76                                                       | 0.37   | 1.46 | 2.07                                              | 0.98   | 4.25 | 1.18                                        | 0.41   | 3.03 |
| $\Sigma$ Pyrethroid***                 | 0.86                                                       | 0.43   | 1.64 | 2.77                                              | 1.34   | 5.68 | 1.51                                        | 0.55   | 3.80 |

Abbreviations: OR: Odds ratios. CI: Confidence Intervals

\*Variables dichotomized at 75th percentile; Reference: Below 75th percentile

\*\*  $\Sigma$  Pyrethroid: Sum of PBA and DCCA

**Table S12.** Odds ratios adjusted for child's sex and maternal smoking during pregnancy for each **10-fold increase** in specific pesticide metabolite concentrations and **childhood allergic outcomes, including prenatal and current exposures** in the same model. ISA study at five years of age, Matina County, Costa Rica 2015-2016

|                                         | Current Nasal Allergies<br>(Allergic Rhinitis)<br>(n = 63) |        |      | Current Itchy Rash<br>(Atopic Eczema)<br>(n = 39) |        |      | Ever doctor-diagnosed<br>Eczema<br>(n = 21) |        |      |
|-----------------------------------------|------------------------------------------------------------|--------|------|---------------------------------------------------|--------|------|---------------------------------------------|--------|------|
|                                         | OR                                                         | 95% CI |      | OR                                                | 95% CI |      | OR                                          | 95% CI |      |
| <b>Prenatal metabolites * (n = 303)</b> |                                                            |        |      |                                                   |        |      |                                             |        |      |
| TCP                                     | 0.65                                                       | 0.23   | 1.74 | 1.29                                              | 0.39   | 3.84 | 1.35                                        | 0.28   | 5.20 |
| ETU                                     | 1.19                                                       | 0.35   | 3.71 | 0.78                                              | 0.18   | 3.08 | 0.95                                        | 0.13   | 5.50 |
| OHP                                     | 1.32                                                       | 0.85   | 2.02 | 0.98                                              | 0.55   | 1.65 | 1.26                                        | 0.62   | 2.38 |
| OHT                                     | 0.84                                                       | 0.59   | 1.18 | 1.09                                              | 0.74   | 1.57 | 1.09                                        | 0.63   | 1.78 |
| 2,4-D                                   | 1.29                                                       | 0.61   | 2.61 | 0.76                                              | 0.26   | 1.88 | 0.43                                        | 0.08   | 1.60 |
| 3PBA                                    | 1.38                                                       | 0.60   | 3.18 | 0.46                                              | 0.15   | 1.34 | 2.33                                        | 0.63   | 8.37 |
| DCCA                                    | 1.53                                                       | 0.69   | 3.42 | 0.67                                              | 0.24   | 1.78 | 1.89                                        | 0.54   | 6.66 |
| ∑ Pyrethroid**                          | 1.45                                                       | 0.62   | 3.38 | 0.54                                              | 0.18   | 1.55 | 2.25                                        | 0.60   | 8.46 |
| <b>Child metabolites * (n = 293)</b>    |                                                            |        |      |                                                   |        |      |                                             |        |      |
| TCP                                     | 0.82                                                       | 0.32   | 2.07 | 0.76                                              | 0.24   | 2.31 | 1.32                                        | 0.30   | 5.22 |
| ETU                                     | 0.64                                                       | 0.32   | 1.29 | 1.64                                              | 0.69   | 4.06 | 0.44                                        | 0.15   | 1.31 |
| OHP                                     | 1.05                                                       | 0.68   | 1.60 | 1.21                                              | 0.71   | 1.97 | 0.80                                        | 0.36   | 1.59 |
| OHT                                     | 1.09                                                       | 0.72   | 1.63 | 1.57                                              | 0.97   | 2.50 | 0.80                                        | 0.39   | 1.53 |
| 2,4-D                                   | 0.96                                                       | 0.47   | 1.84 | 1.18                                              | 0.50   | 2.51 | 1.06                                        | 0.32   | 2.82 |
| 3PBA                                    | 0.91                                                       | 0.47   | 1.75 | 3.24                                              | 1.44   | 7.60 | 1.31                                        | 0.46   | 3.77 |
| DCCA                                    | 0.92                                                       | 0.46   | 1.83 | 2.44                                              | 1.06   | 5.67 | 1.76                                        | 0.60   | 5.08 |
| ∑ Pyrethroid**                          | 0.89                                                       | 0.44   | 1.80 | 3.03                                              | 1.29   | 7.29 | 1.63                                        | 0.53   | 4.92 |

Abbreviations: OR: Odds ratios. CI: Confidence Intervals

\*Variables dichotomized at 75th percentile; Reference: Below 75th percentile

\*\* ∑ Pyrethroid: Sum of PBA and DCCA

**Table S13:** Odds ratios adjusted for maternal smoking during pregnancy, child's sex, parity, and maternal history of asthma (yes/no), of high ( $\geq P75$ ) specific pesticide exposures and childhood allergic outcomes. ISA study at five years of age. Matina County, Costa Rica 2015-2016

|                                               | Current Nasal Allergies<br>(Allergic Rhinitis)<br>(n = 63) |        |      | Current Itchy Rash<br>(Atopic Eczema)<br>(n = 39) |        |      | Ever doctor-diagnosed<br>Eczema<br>(n = 21) |        |      |
|-----------------------------------------------|------------------------------------------------------------|--------|------|---------------------------------------------------|--------|------|---------------------------------------------|--------|------|
|                                               | OR                                                         | 95% CI |      | OR                                                | 95% CI |      | OR                                          | 95% CI |      |
| <b><i>Prenatal metabolites* (n = 303)</i></b> |                                                            |        |      |                                                   |        |      |                                             |        |      |
| TCP                                           | 0.49                                                       | 0.22   | 0.99 | 0.80                                              | 0.33   | 1.76 | 0.71                                        | 0.20   | 2.01 |
| ETU                                           | 0.73                                                       | 0.36   | 1.41 | 0.70                                              | 0.27   | 1.61 | 0.74                                        | 0.20   | 2.12 |
| OHP                                           | 1.37                                                       | 0.73   | 2.52 | 1.05                                              | 0.46   | 2.25 | 2.46                                        | 0.96   | 6.15 |
| OHT                                           | 0.62                                                       | 0.30   | 1.21 | 1.38                                              | 0.63   | 2.90 | 0.90                                        | 0.28   | 2.44 |
| 2.4-D                                         | 1.43                                                       | 0.75   | 2.64 | 1.22                                              | 0.54   | 2.58 | 1.02                                        | 0.32   | 2.80 |
| 3PBA                                          | 1.23                                                       | 0.64   | 2.29 | 0.55                                              | 0.21   | 1.29 | 1.71                                        | 0.61   | 4.38 |
| DCCA                                          | 1.04                                                       | 0.53   | 1.95 | 1.16                                              | 0.51   | 2.45 | 1.33                                        | 0.46   | 3.48 |
| $\Sigma$ Pyrethroid***                        | 1.03                                                       | 0.53   | 1.94 | 0.84                                              | 0.35   | 1.84 | 1.78                                        | 0.64   | 4.61 |
| <b><i>Child metabolites* (n = 293)</i></b>    |                                                            |        |      |                                                   |        |      |                                             |        |      |
| TCP                                           | 0.95                                                       | 0.48   | 1.79 | 0.59                                              | 0.22   | 1.35 | 0.92                                        | 0.29   | 2.46 |
| ETU                                           | 0.51                                                       | 0.23   | 1.04 | 1.37                                              | 0.63   | 2.87 | 0.29                                        | 0.05   | 1.04 |
| OHP                                           | 1.40                                                       | 0.73   | 2.63 | 1.22                                              | 0.54   | 2.60 | 0.71                                        | 0.20   | 2.05 |
| OHT                                           | 1.23                                                       | 0.64   | 2.30 | 1.60                                              | 0.74   | 3.34 | 0.31                                        | 0.05   | 1.12 |
| 2.4-D                                         | 1.21                                                       | 0.62   | 2.27 | 1.20                                              | 0.53   | 2.55 | 1.35                                        | 0.46   | 3.55 |
| 3PBA                                          | 0.83                                                       | 0.41   | 1.59 | 2.53                                              | 1.22   | 5.18 | 1.13                                        | 0.38   | 2.95 |
| DCCA                                          | 0.74                                                       | 0.36   | 1.43 | 2.07                                              | 0.99   | 4.26 | 1.13                                        | 0.39   | 2.93 |
| $\Sigma$ Pyrethroid***                        | 0.84                                                       | 0.42   | 1.61 | 2.70                                              | 1.31   | 5.54 | 1.48                                        | 0.54   | 3.75 |

Abbreviations: OR: Odds ratios. CI: Confidence Intervals

\*Variables dichotomized at 75th percentile; Reference: Below 75th percentile

\*\* $\Sigma$  Pyrethroid: Sum of PBA and DCCA

**Table S14:** Odds ratios adjusted for maternal smoking during pregnancy, child's sex, parity, and breastfeeding of high ( $\geq 75$ ) specific pesticide exposures and childhood allergic outcomes. ISA study at five years of age. Matina County. Costa Rica 2015-2016

|                                        | Current Nasal Allergies<br>(Allergic Rhinitis)<br>(n = 63) |        |      | Current Itchy Rash<br>(Atopic Eczema)<br>(n = 39) |        |      | Ever doctor-diagnosed<br>Eczema<br>(n = 21) |        |      |
|----------------------------------------|------------------------------------------------------------|--------|------|---------------------------------------------------|--------|------|---------------------------------------------|--------|------|
|                                        | OR**                                                       | 95% CI |      | OR**                                              | 95% CI |      | OR**                                        | 95% CI |      |
| <b>Prenatal metabolites* (n = 303)</b> |                                                            |        |      |                                                   |        |      |                                             |        |      |
| TCP                                    | 0.48                                                       | 0.22   | 0.97 | 0.80                                              | 0.33   | 1.75 | 0.68                                        | 0.19   | 1.93 |
| ETU                                    | 0.71                                                       | 0.35   | 1.38 | 0.68                                              | 0.26   | 1.57 | 0.68                                        | 0.19   | 1.94 |
| OHP                                    | 1.36                                                       | 0.72   | 2.49 | 1.07                                              | 0.47   | 2.30 | 2.44                                        | 0.95   | 6.03 |
| OHT                                    | 0.64                                                       | 0.31   | 1.25 | 1.36                                              | 0.62   | 2.86 | 0.93                                        | 0.29   | 2.49 |
| 2.4-D                                  | 1.38                                                       | 0.73   | 2.55 | 1.21                                              | 0.54   | 2.54 | 0.94                                        | 0.30   | 2.53 |
| 3PBA                                   | 1.21                                                       | 0.63   | 2.25 | 0.54                                              | 0.20   | 1.27 | 1.59                                        | 0.57   | 4.05 |
| DCCA                                   | 1.02                                                       | 0.52   | 1.91 | 1.13                                              | 0.50   | 2.38 | 1.21                                        | 0.42   | 3.10 |
| $\Sigma$ Pyrethroid***                 | 1.01                                                       | 0.52   | 1.90 | 0.81                                              | 0.34   | 1.76 | 1.56                                        | 0.57   | 3.96 |
| <b>Child metabolites* (n = 293)</b>    |                                                            |        |      |                                                   |        |      |                                             |        |      |
| TCP                                    | 0.95                                                       | 0.48   | 1.80 | 0.59                                              | 0.22   | 1.36 | 0.93                                        | 0.29   | 2.47 |
| ETU                                    | 0.52                                                       | 0.23   | 1.04 | 1.36                                              | 0.62   | 2.85 | 0.29                                        | 0.05   | 1.04 |
| OHP                                    | 1.32                                                       | 0.69   | 2.48 | 1.22                                              | 0.54   | 2.62 | 0.67                                        | 0.18   | 1.91 |
| OHT                                    | 1.20                                                       | 0.62   | 2.24 | 1.54                                              | 0.71   | 3.19 | 0.29                                        | 0.05   | 1.03 |
| 2.4-D                                  | 1.21                                                       | 0.62   | 2.26 | 1.15                                              | 0.51   | 2.45 | 1.25                                        | 0.43   | 3.24 |
| 3PBA                                   | 0.85                                                       | 0.42   | 1.63 | 2.59                                              | 1.25   | 5.29 | 1.23                                        | 0.42   | 3.18 |
| DCCA                                   | 0.75                                                       | 0.37   | 1.44 | 2.13                                              | 1.01   | 4.39 | 1.20                                        | 0.41   | 3.10 |
| $\Sigma$ Pyrethroid***                 | 0.84                                                       | 0.42   | 1.61 | 2.79                                              | 1.34   | 5.73 | 1.55                                        | 0.57   | 3.91 |

Abbreviations: OR: Odds ratios. CI: Confidence Intervals

\*Variables dichotomized at 75th percentile; Reference: Below 75th percentile

\*\*  $\Sigma$  Pyrethroid: Sum of PBA and DCCA

**Table S15:** Odds ratios adjusted for **current smoking in house**, **child's sex**, and **parity** of high ( $\geq P75$ ) specific pesticide exposures and **childhood allergic outcomes**. ISA study at five years of age. Matina County, Costa Rica 2015-2016

|                                        | Current Nasal Allergies<br>(Allergic Rhinitis)<br>(n = 63) |        |      | Current Itchy Rash<br>(Atopic Eczema)<br>(n = 39) |        |      | Ever doctor-diagnosed<br>Eczema<br>(n = 21) |        |      |
|----------------------------------------|------------------------------------------------------------|--------|------|---------------------------------------------------|--------|------|---------------------------------------------|--------|------|
|                                        | OR**                                                       | 95% CI |      | OR**                                              | 95% CI |      | OR**                                        | 95% CI |      |
| <b>Prenatal metabolites* (n = 303)</b> |                                                            |        |      |                                                   |        |      |                                             |        |      |
| TCP                                    | 0.50                                                       | 0.23   | 1.00 | 0.87                                              | 0.37   | 1.87 | 0.68                                        | 0.19   | 1.92 |
| ETU                                    | 0.71                                                       | 0.35   | 1.36 | 0.63                                              | 0.25   | 1.43 | 0.68                                        | 0.19   | 1.94 |
| OHP                                    | 1.37                                                       | 0.73   | 2.51 | 1.06                                              | 0.47   | 2.24 | 2.41                                        | 0.94   | 5.96 |
| OHT                                    | 0.63                                                       | 0.30   | 1.22 | 1.41                                              | 0.65   | 2.91 | 0.94                                        | 0.30   | 2.52 |
| 2,4-D                                  | 1.41                                                       | 0.75   | 2.59 | 1.38                                              | 0.64   | 2.83 | 0.94                                        | 0.30   | 2.49 |
| 3PBA                                   | 1.22                                                       | 0.64   | 2.26 | 0.62                                              | 0.24   | 1.41 | 1.59                                        | 0.58   | 4.04 |
| DCCA                                   | 1.02                                                       | 0.53   | 1.91 | 1.19                                              | 0.54   | 2.48 | 1.21                                        | 0.42   | 3.12 |
| $\Sigma$ Pyrethroid***                 | 1.01                                                       | 0.52   | 1.90 | 0.87                                              | 0.37   | 1.87 | 1.58                                        | 0.58   | 3.98 |
| <b>Child metabolites* (n = 293)</b>    |                                                            |        |      |                                                   |        |      |                                             |        |      |
| TCP                                    | 0.93                                                       | 0.47   | 1.76 | 0.63                                              | 0.24   | 1.42 | 0.92                                        | 0.29   | 2.47 |
| ETU                                    | 0.52                                                       | 0.24   | 1.04 | 1.37                                              | 0.64   | 2.83 | 0.29                                        | 0.05   | 1.05 |
| OHP                                    | 1.35                                                       | 0.70   | 2.52 | 1.17                                              | 0.52   | 2.45 | 0.66                                        | 0.18   | 1.88 |
| OHT                                    | 1.19                                                       | 0.62   | 2.21 | 1.58                                              | 0.74   | 3.12 | 0.29                                        | 0.05   | 1.03 |
| 2,4-D                                  | 1.20                                                       | 0.62   | 2.25 | 1.19                                              | 0.54   | 2.49 | 1.26                                        | 0.43   | 3.27 |
| 3PBA                                   | 0.88                                                       | 0.44   | 1.68 | 2.63                                              | 1.29   | 5.31 | 1.23                                        | 0.42   | 3.20 |
| DCCA                                   | 0.77                                                       | 0.38   | 1.49 | 2.05                                              | 0.99   | 4.15 | 1.20                                        | 0.41   | 3.10 |
| $\Sigma$ Pyrethroid***                 | 0.87                                                       | 0.43   | 1.67 | 2.65                                              | 1.30   | 5.33 | 1.55                                        | 0.57   | 3.91 |

Abbreviations: OR: Odds ratios. CI: Confidence Intervals

\*Variables dichotomized at 75th percentile; Reference: Below 75th percentile

\*\*  $\Sigma$  Pyrethroid: Sum of PBA and DCCA

**Table S16:** Odds ratios adjusted for maternal smoking during pregnancy and child's sex for recent environmental exposures and current **respiratory outcomes** in 293 five-year-old children from the ISA study. Matina County, Costa Rica. 2015-2016

|                                                     | <i>n</i> | <i>%</i> | Current Wheeze<br>(N = 62) |        |      | Ever doctor-<br>diagnosed Asthma<br>(N= 37) |        |      | Current dry cough<br>(N= 118) |        |      | Current LRTI<br>(N=49) |        |       |
|-----------------------------------------------------|----------|----------|----------------------------|--------|------|---------------------------------------------|--------|------|-------------------------------|--------|------|------------------------|--------|-------|
|                                                     |          |          | OR                         | 95% CI |      | OR                                          | 95% CI |      | OR                            | 95% CI |      | OR                     | 95% CI |       |
| Current maternal banana work                        | 43       | 14       | 0.63                       | 0.23   | 1.47 | 1.38                                        | 0.48   | 3.41 | 1.06                          | 0.54   | 2.06 | 0.94                   | 0.14   | 3.62  |
| Maternal work in banana plantation in last 3 years  | 88       | 29       | 1.01                       | 0.54   | 1.86 | 1.22                                        | 0.56   | 2.54 | 1.08                          | 0.64   | 1.79 | 0.90                   | 0.24   | 2.73  |
| Current maternal work in agriculture                | 49       | 16       | 0.63                       | 0.25   | 1.42 | 1.14                                        | 0.40   | 2.79 | 1.23                          | 0.65   | 2.29 | 1.31                   | 0.29   | 4.38  |
| Maternal work in agriculture in last 3 years        | 99       | 33       | 1.00                       | 0.54   | 1.80 | 1.17                                        | 0.55   | 2.40 | 1.19                          | 0.72   | 1.95 | 1.05                   | 0.32   | 3.04  |
| Current paternal work in banana plantation          | 138      | 46       | 0.53                       | 0.28   | 0.95 | 1.01                                        | 0.48   | 2.11 | 1.05                          | 0.65   | 1.71 | 0.86                   | 0.27   | 2.66  |
| Paternal work in banana plantations in last 3 years | 156      | 51       | 0.68                       | 0.38   | 1.20 | 0.87                                        | 0.43   | 1.74 | 0.99                          | 0.62   | 1.57 | 0.58                   | 0.19   | 1.64  |
| ≥50 meters distance to banana plantations           | 232      | 75       | 0.59                       | 0.25   | 1.27 | 0.65                                        | 0.21   | 1.63 | 1.35                          | 0.74   | 2.43 | 0.67                   | 0.10   | 2.53  |
| Current vector control                              | 169      | 56       | 1.17                       | 0.65   | 2.13 | 1.03                                        | 0.50   | 2.19 | 1.77                          | 1.08   | 2.91 | 2.78                   | 0.84   | 12.53 |
| Use of pesticides inside the house                  | 152      | 50       | 1.40                       | 0.78   | 2.55 | 0.99                                        | 0.47   | 2.07 | 0.96                          | 0.60   | 1.54 | 0.50                   | 0.15   | 1.50  |
| Daily exposure to smoke of waste burning            | 50       | 17       | 0.53                       | 0.20   | 1.20 | 0.34                                        | 0.08   | 1.04 | 1.28                          | 0.68   | 2.38 | 1.27                   | 0.28   | 4.24  |
| 1-HP*                                               | 74       | 25       | 1.28                       | 0.66   | 2.40 | 1.53                                        | 0.68   | 3.29 | 1.42                          | 0.82   | 2.44 | 0.75                   | 0.17   | 2.48  |
| 2-OH-PH*                                            | 74       | 25       | 0.84                       | 0.42   | 1.62 | 0.66                                        | 0.25   | 1.53 | 1.40                          | 0.81   | 2.40 | 1.10                   | 0.30   | 3.36  |

*Abbreviations:* OR: Odds ratios. CI: Confidence Intervals. 1-HP: 1-hydroxypyrene. 2-OH-PH: hydroxyphenanthrene

\*Variables dichotomized at 75th percentile; Reference: Below 75th percentile

**Table S17:** Odds ratios adjusted for maternal smoking during pregnancy and child's sex for recent environmental exposures and current **allergic outcomes** in 293 five-year-old children from the ISA study. Matina County, Costa Rica. 2015-2016

|                                                                                               | <i>n</i> | <i>%</i> | Current Nasal Allergies (Allergic Rhinitis) (n = 63) |      |      | Current Itchy Rash (Atopic Eczema) (n = 39) |      |      | Ever doctor-diagnosed Eczema (n = 21) |        |      | Current Nasal Allergies (Allergic Rhinitis) (n = 63) |      |       |
|-----------------------------------------------------------------------------------------------|----------|----------|------------------------------------------------------|------|------|---------------------------------------------|------|------|---------------------------------------|--------|------|------------------------------------------------------|------|-------|
|                                                                                               |          |          | OR                                                   | OR   | OR   | 95% CI                                      | OR   | OR   | OR                                    | 95% CI | OR   | OR                                                   | OR   |       |
| Current maternal banana work                                                                  | 43       | 14       | 1.86                                                 | 0.85 | 0.35 | 1.86                                        | 0.85 | 0.35 | 1.86                                  | 0.85   | 0.35 | 1.86                                                 | 0.14 | 3.62  |
| Maternal work in banana plantation in last 3 years                                            | 88       | 29       | 1.78                                                 | 0.98 | 0.52 | 1.78                                        | 0.98 | 0.52 | 1.78                                  | 0.98   | 0.52 | 1.78                                                 | 0.24 | 2.73  |
| Current maternal work in agriculture                                                          | 49       | 16       | 2.00                                                 | 0.96 | 0.43 | 2.00                                        | 0.96 | 0.43 | 2.00                                  | 0.96   | 0.43 | 2.00                                                 | 0.29 | 4.38  |
| Maternal work in agriculture in last 3 years                                                  | 99       | 33       | 1.71                                                 | 0.95 | 0.52 | 1.71                                        | 0.95 | 0.52 | 1.71                                  | 0.95   | 0.52 | 1.71                                                 | 0.32 | 3.04  |
| Current paternal work in banana plantation                                                    | 138      | 46       | 1.66                                                 | 0.93 | 0.52 | 1.66                                        | 0.93 | 0.52 | 1.66                                  | 0.93   | 0.52 | 1.66                                                 | 0.27 | 2.66  |
| Paternal work in banana plantations in last 3 years                                           | 156      | 51       | 1.47                                                 | 0.84 | 0.48 | 1.47                                        | 0.84 | 0.48 | 1.47                                  | 0.84   | 0.48 | 1.47                                                 | 0.19 | 1.64  |
| Paternal work in banana plantations in last 3 years ≥50 meters distance to banana plantations | 232      | 75       | 1.84                                                 | 0.92 | 0.42 | 1.84                                        | 0.92 | 0.42 | 1.84                                  | 0.92   | 0.42 | 1.84                                                 | 0.10 | 2.53  |
| Current vector control                                                                        | 169      | 56       | 1.69                                                 | 0.95 | 0.53 | 1.69                                        | 0.95 | 0.53 | 1.69                                  | 0.95   | 0.53 | 1.69                                                 | 0.84 | 12.53 |
| Use of pesticides inside the house                                                            | 152      | 50       | 2.06                                                 | 1.16 | 0.66 | 2.06                                        | 1.16 | 0.66 | 2.06                                  | 1.16   | 0.66 | 2.06                                                 | 0.15 | 1.50  |
| Daily exposure to smoke of waste burning                                                      | 50       | 17       | 2.47                                                 | 1.23 | 0.58 | 2.47                                        | 1.23 | 0.58 | 2.47                                  | 1.23   | 0.58 | 2.47                                                 | 0.28 | 4.24  |
| 1-HP*                                                                                         | 74       | 25       | 2.99                                                 | 1.62 | 0.86 | 2.99                                        | 1.62 | 0.86 | 2.99                                  | 1.62   | 0.86 | 2.99                                                 | 0.17 | 2.48  |
| 2-OH-PH*                                                                                      | 74       | 25       | 1.17                                                 | 0.59 | 0.28 | 1.17                                        | 0.59 | 0.28 | 1.17                                  | 0.59   | 0.28 | 1.17                                                 | 0.30 | 3.36  |

*Abbreviations:* OR: Odds ratios. CI: Confidence Intervals. 1-HP: 1-hydroxypyrene. 2-OH-PH: hydroxyphenanthrene

\*Variables dichotomized at 75th percentile; Reference: Below 75th percentile
